# Supplementary material for: Carbon footprint of single-use consumables used during canine hemilaminectomies
Source: Research Square preprint supplement (doi:10.21203/rs.3.rs-7696425/v1), 2025-10-30
Supplement: Supplementary file 1 [file 9f883cd8133d65f25ea95998.docx]

# Appendix 1: Item level emissions (gCO2e) for 92 consumables

| Consumable | Total gCO2e/item |
| --- | --- |
| Topical skin adhesive 0.8g | 3922 |
| Drape, fenestrated, size unknown | 2739.93 |
| Drape, Patient, 260cm x 150cm | 1303.36 |
| Drape, Patient, 180cm x 175cm | 1051.84 |
| Trolley cover/ table drape | 1049.85 |
| ECG Pads Normal | 800 |
| Swabs (30 x 30, sterile) | 713.28 |
| Gown (surgical) including hand towels | 649.17 |
| Fluids Hartmann’s 1000ml | 636.98 |
| Fluids Saline 1000ml | 636.98 |
| 26 ml skin preparation applicator | 544.65 |
| Suction tubing | 436.64 |
| Durapore white tape | 370.67 |
| Elastic adhesive bandage (red tape) | 370.67 |
| Skin Stapler | 368.12 |
| Self-adherent bandage (Co-flex) | 342.19 |
| Fluids Hartmanns 500ml | 318.49 |
| Fluids Saline 500ml | 318.49 |
| Diathermy bipolar lead | 307.9 |
| Crepe bandage (TUBE TIE) | 275.02 |
| Sharps pad | 254.93 |
| Drape, Patient, 90cm x 75cm | 228.66 |
| Bair hugger blanket | 226.56 |
| 10.5 ml skin preparation applicator | 223.91 |
| Swabs 10cm x 10cm (10 pack, sterile) | 203.27 |
| 30 ml syringe | 178.53 |
| Kidney dish 800ml | 147.07 |
| 50 ml syringe | 136.93 |
| Diathermy bipolar forceps | 127.41 |
| Gloves (sterile) pack | 124.14 |
| ETT 9 | 119.81 |
| Giving set | 116.82 |
| Drape, incise, “opsite” 30cm x 28cm | 116.08 |
| Fluids Saline 100ml | 115.98 |
| ETT 8 | 105.49 |
| Incontinence Pad | 95.65 |
| Soft bandage (cast padding bandage) | 93.99 |
| ETT 7 | 87.85 |
| Diathermy pad | 83.46 |
| Black waste bag | 80.57 |
| ETT 6.5 | 75.81 |
| Drape Tape | 71.69 |
| ETT 6 | 69.15 |
| 20 ml syringe | 65.05 |
| Single use apron (green) | 65 |
| ETT 5.5 | 60.89 |
| Suction tip | 58.07 |
| ETT 5 | 54.11 |
| Posiflush 10ml | 53.54 |
| Dressing, non-woven, primapore (10 x 30) | 49.99 |
| Extension line normal | 46.66 |
| Y- connector | 42.37 |
| ETT 4.5 | 40.67 |
| 10.5 ml skin preparation applicator | 37.18 |
| IV catheter 18G | 35.96 |
| IV catheter 20G | 35.45 |
| 100 mm Nerve stimulator Needle | 34.98 |
| IV catheter 22G | 33.75 |
| IV catheter 24G | 33.57 |
| Yellow waste bag | 30.57 |
| Straight-connector | 28.39 |
| 10 ml syringe | 27.66 |
| Clinell wipe (large) | 24.06 |
| 3-way-tap | 23.76 |
| Dressing, non-woven, primapore (10 x 20) | 23.48 |
| Gloves (non sterile) pair | 22.05 |
| Needle free connector | 20.9 |
| Surgical face mask | 17.43 |
| Suture material Monocryl | 16.99 |
| Suture material Nylon | 16.99 |
| Suture material PDS | 16.99 |
| 5 ml syringe | 16.64 |
| Butt plug (tampon) | 14.5 |
| 1 ml syringe | 11.51 |
| 2 ml syringe | 10.22 |
| “Surgicel” Snow | 9.9 |
| Scalpel blade 10 | 8.11 |
| Scalpel blade 11 | 7.51 |
| Scalpel blade 15 | 7.09 |
| Swabs (non-sterile) | 6.5 |
| Eye lube | 6 |
| Sterile lube | 6 |
| Red bungs | 5.03 |
| 16G White Needle | 4.67 |
| 21G Green Needle | 3.61 |
| Surgical hat | 3.54 |
| Blunt 18G Red Needle | 3.35 |
| 23G 5/8-inch Blue Needle | 3.18 |
| 25G Orange Needle | 3.14 |
| 23G 1-inch Blue Needle | 2.68 |
| Individual alcohol swab | 1.94 |
| Bone wax | 1.7 |

# Appendix 2: Number of each consumable used per procedure and total gCO2e per consumable over 10 procedures

| Consumable | Total gCO2e/item | Case 1 | Case 2 | Case 3 | Case 4 | Case 5 | Case 6 | Case 7 | Case 8 | Case 9 | Case 10 | Total Used | Total g/CO2e |
| --- | --- | --- | --- | --- | --- | --- | --- | --- | --- | --- | --- | --- | --- |
| 1 ml syringe | 11.51 | 5 | 17 | 6 | 3 | 3 | 4 | 2 | 2 | 4 | 5 | 51 | 587.01 |
| 10 ml syringe | 27.66 | 2 | 1 | 0 | 0 | 2 | 0 | 0 | 1 | 1 | 0 | 7 | 193.62 |
| 100 mm Nerve stimulator Needle | 34.98 | 0 | 0 | 0 | 1 | 1 | 1 | 1 | 0 | 0 | 0 | 4 | 139.92 |
| 16G White Needle | 4.67 | 2 | 0 | 1 | 1 | 0 | 1 | 1 | 2 | 1 | 1 | 10 | 46.7 |
| 2 ml syringe | 10.22 | 2 | 1 | 1 | 5 | 2 | 7 | 3 | 1 | 2 | 2 | 26 | 265.72 |
| 20 ml syringe | 65.05 | 0 | 0 | 0 | 1 | 0 | 1 | 1 | 0 | 0 | 1 | 4 | 260.2 |
| 21G Green Needle | 3.61 | 5 | 1 | 1 | 2 | 7 | 10 | 2 | 3 | 6 | 2 | 39 | 140.79 |
| 23G 1-inch Blue Needle | 2.68 | 0 | 0 | 0 | 0 | 0 | 0 | 0 | 1 | 0 | 0 | 1 | 2.68 |
| 23G 5/8-inch Blue Needle | 3.18 | 2 | 14 | 2 | 4 | 2 | 2 | 4 | 2 | 1 | 5 | 38 | 120.84 |
| 25G Orange Needle | 3.14 | 0 | 0 | 1 | 1 | 0 | 0 | 0 | 0 | 2 | 0 | 4 | 12.56 |
| 3-way-tap | 23.76 | 0 | 1 | 0 | 0 | 0 | 0 | 0 | 0 | 0 | 0 | 1 | 23.76 |
| 30 ml syringe | 178.53 | 0 | 1 | 0 | 0 | 0 | 0 | 0 | 0 | 0 | 0 | 1 | 178.53 |
| 5 ml syringe | 16.64 | 1 | 1 | 2 | 1 | 3 | 3 | 3 | 2 | 1 | 1 | 18 | 299.52 |
| 50 ml syringe | 136.93 | 0 | 0 | 0 | 0 | 0 | 0 | 0 | 0 | 0 | 0 | 0 | 0 |
| Bair hugger blanket | 226.56 | 0 | 0 | 1 | 1 | 0 | 0 | 1 | 1 | 1 | 0 | 5 | 1132.8 |
| Black waste bag | 80.57 | 1 | 1 | 2 | 2 | 2 | 0 | 1 | 1 | 1 | 1 | 12 | 966.84 |
| Blunt 18G Red Needle | 3.35 | 0 | 0 | 0 | 0 | 0 | 0 | 1 | 0 | 0 | 0 | 1 | 3.35 |
| Bone wax | 1.7 | 0 | 0 | 0 | 0 | 1 | 0 | 1 | 1 | 0 | 0 | 3 | 5.1 |
| Butt plug (tampon) | 14.5 | 0 | 0 | 0 | 0 | 1 | 0 | 0 | 0 | 0 | 0 | 1 | 14.5 |
| “Clinell” wipe (large) | 24.06 | 0 | 0 | 0 | 2 | 0 | 0 | 0 | 0 | 0 | 0 | 2 | 48.12 |
| Crepe bandage (TUBE TIE) | 275.02 | 1 | 1 | 1 | 1 | 1 | 1 | 1 | 1 | 1 | 1 | 10 | 2750.2 |
| Diathermy bipolar forceps | 127.41 | 1 | 1 | 1 | 1 | 1 | 1 | 1 | 1 | 1 | 1 | 10 | 1274.1 |
| Diathermy bipolar lead | 307.9 | 1 | 1 | 1 | 1 | 1 | 1 | 1 | 1 | 1 | 1 | 10 | 3079 |
| Diathermy pad | 83.46 | 0 | 0 | 0 | 1 | 0 | 1 | 0 | 0 | 0 | 0 | 2 | 166.92 |
| Drape Tape | 71.69 | 2 | 2 | 0 | 1 | 0 | 1 | 2 | 1 | 2 | 2 | 13 | 931.97 |
| Drape, fenestrated, size unknown | 2739.93 | 0 | 0 | 0 | 0 | 0 | 0 | 0 | 0 | 0 | 0 | 0 | 0 |
| Drape, incise, “opsite” 30cm x 28cm | 116.08 | 0 | 0 | 0 | 1 | 1 | 1 | 1 | 1 | 1 | 1 | 7 | 812.56 |
| Drape, Patient, 180cm x 175cm | 1051.84 | 2 | 2 | 0 | 2 | 0 | 0 | 1 | 1 | 0 | 1 | 9 | 9466.56 |
| Drape, Patient, 260cm x 150cm | 1303.36 | 0 | 0 | 2 | 0 | 2 | 2 | 1 | 1 | 2 | 1 | 11 | 14336.96 |
| Drape, Patient, 90cm x 75cm | 228.66 | 2 | 2 | 2 | 2 | 2 | 2 | 2 | 1 | 2 | 1 | 18 | 4115.88 |
| Dressing, non-woven, “primapore” (10 x 20) | 23.48 | 0 | 0 | 0 | 0 | 0 | 0 | 0 | 0 | 0 | 0 | 0 | 0 |
| Dressing, non-woven, primapore (10 x 30) | 49.99 | 1 | 1 | 1 | 1 | 0 | 1 | 1 | 1 | 1 | 0 | 8 | 399.92 |
| Durapore white tape | 370.67 | 1 | 1 | 1 | 1 | 1 | 1 | 1 | 1 | 2 | 1 | 11 | 4077.37 |
| ECG Pads Normal | 800 | 3 | 4 | 3 | 3 | 3 | 3 | 3 | 3 | 3 | 3 | 31 | 24800 |
| Elastic adhesive bandage (red tape) | 370.67 | 1 | 1 | 1 | 1 | 0 | 1 | 0 | 0 | 0 | 1 | 6 | 2224.02 |
| ETT 4.5 | 40.67 | 0 | 0 | 0 | 0 | 1 | 0 | 0 | 0 | 0 | 0 | 1 | 40.67 |
| ETT 5 | 54.11 | 0 | 1 | 0 | 0 | 0 | 0 | 0 | 0 | 0 | 0 | 1 | 54.11 |
| ETT 5.5 | 60.89 | 0 | 0 | 0 | 0 | 0 | 1 | 1 | 0 | 0 | 0 | 2 | 121.78 |
| ETT 6 | 69.15 | 0 | 0 | 1 | 1 | 0 | 0 | 0 | 0 | 0 | 1 | 3 | 207.45 |
| ETT 6.5 | 75.81 | 1 | 0 | 0 | 0 | 0 | 0 | 0 | 0 | 1 | 0 | 2 | 151.62 |
| ETT 7 | 87.85 | 0 | 0 | 0 | 0 | 0 | 0 | 0 | 1 | 0 | 0 | 1 | 87.85 |
| ETT 8 | 105.49 | 0 | 0 | 0 | 0 | 0 | 0 | 0 | 0 | 0 | 0 | 0 | 0 |
| ETT 9 | 119.81 | 0 | 0 | 0 | 0 | 0 | 0 | 0 | 0 | 0 | 0 | 0 | 0 |
| Extension line normal | 46.66 | 1 | 3 | 1 | 1 | 1 | 1 | 1 | 1 | 1 | 1 | 12 | 559.92 |
| Eye lube | 6 | 1 | 1 | 1 | 1 | 2 | 4 | 4 | 2 | 2 | 1 | 19 | 114 |
| Fluids Hartmann’s 1000ml | 636.98 | 0 | 0 | 0 | 0 | 0 | 0 | 0 | 0 | 0 | 0 | 0 | 0 |
| Fluids Hartmann’s 500ml | 318.49 | 1 | 1 | 1 | 1 | 1 | 1 | 1 | 1 | 1 | 1 | 10 | 3184.9 |
| Fluids Saline 1000ml | 636.98 | 0 | 0 | 0 | 0 | 0 | 0 | 0 | 0 | 0 | 0 | 0 | 0 |
| Fluids Saline 100ml | 115.98 | 0 | 0 | 0 | 0 | 0 | 0 | 0 | 0 | 0 | 0 | 0 | 0 |
| Fluids Saline 500ml | 318.49 | 1 | 1 | 1 | 1 | 1 | 1 | 1 | 1 | 1 | 1 | 10 | 3184.9 |
| Giving set | 116.82 | 1 | 1 | 1 | 1 | 1 | 1 | 1 | 1 | 1 | 1 | 10 | 1168.2 |
| Gloves (non sterile) pair | 22.05 | 4 | 2 | 1 | 3 | 15 | 1 | 4 | 3 | 6 | 4 | 43 | 948.15 |
| Gloves (sterile) pack | 124.14 | 3 | 3 | 3 | 2 | 2 | 4 | 4 | 1 | 1 | 1 | 24 | 2979.36 |
| Gown (surgical) including hand towels | 649.17 | 2 | 3 | 3 | 1 | 2 | 2 | 3 | 1 | 1 | 1 | 19 | 12334.23 |
| Incontinence Pad | 95.65 | 9 | 1 | 4 | 2 | 10 | 3 | 2 | 3 | 7 | 3 | 44 | 4208.6 |
| Individual alcohol swab | 1.94 | 1 | 5 | 0 | 1 | 6 | 2 | 0 | 1 | 1 | 2 | 19 | 36.86 |
| IV catheter 18G | 35.96 | 0 | 0 | 0 | 0 | 0 | 0 | 0 | 0 | 0 | 0 | 0 | 0 |
| IV catheter 20G | 35.45 | 0 | 0 | 0 | 0 | 0 | 1 | 2 | 0 | 0 | 0 | 3 | 106.35 |
| IV catheter 22G | 33.75 | 1 | 1 | 0 | 1 | 0 | 1 | 0 | 0 | 0 | 3 | 7 | 236.25 |
| IV catheter 24G | 33.57 | 0 | 0 | 2 | 0 | 0 | 2 | 0 | 0 | 0 | 0 | 4 | 134.28 |
| Kidney dish 800ml | 147.07 | 1 | 1 | 1 | 1 | 1 | 1 | 1 | 1 | 1 | 1 | 10 | 1470.7 |
| Needle free connector | 20.9 | 0 | 0 | 0 | 0 | 0 | 1 | 0 | 0 | 0 | 0 | 1 | 20.9 |
| “Posiflush” 10ml | 53.54 | 2 | 3 | 3 | 1 | 4 | 3 | 3 | 2 | 1 | 2 | 24 | 1284.96 |
| Red bungs | 5.03 | 4 | 4 | 5 | 1 | 1 | 0 | 0 | 1 | 2 | 1 | 19 | 95.57 |
| Scalpel blade 10 | 8.11 | 1 | 2 | 1 | 1 | 1 | 1 | 1 | 1 | 1 | 1 | 11 | 89.21 |
| Scalpel blade 11 | 7.51 | 0 | 0 | 1 | 0 | 0 | 0 | 1 | 0 | 0 | 0 | 2 | 15.02 |
| Scalpel blade 15 | 7.09 | 0 | 0 | 0 | 0 | 0 | 0 | 0 | 0 | 0 | 0 | 0 | 0 |
| Self-adherent bandage (Co-flex) | 342.19 | 1 | 1 | 1 | 1 | 1 | 1 | 0 | 1 | 1 | 1 | 9 | 3079.71 |
| Sharps pad | 254.93 | 1 | 2 | 1 | 1 | 1 | 1 | 1 | 1 | 1 | 1 | 11 | 2804.23 |
| Single use apron (green) | 65 | 1 | 1 | 0 | 1 | 1 | 1 | 1 | 1 | 2 | 1 | 10 | 650 |
| Skin preparation applicator 10.5ml | 223.91 | 1 | 1 | 1 | 1 | 1 | 0 | 2 | 2 | 2 | 2 | 13 | 2910.83 |
| Skin preparation applicator 26ml | 544.65 | 2 | 0 | 1 | 0 | 0 | 0 | 0 | 0 | 0 | 0 | 3 | 1633.95 |
| Skin preparation applicator 3ml | 37.18 | 0 | 0 | 0 | 1 | 0 | 3 | 1 | 0 | 0 | 1 | 6 | 223.08 |
| Skin Stapler | 368.12 | 0 | 0 | 0 | 0 | 1 | 0 | 0 | 0 | 0 | 0 | 1 | 368.12 |
| Soft bandage (cast padding bandage) | 93.99 | 1 | 1 | 1 | 1 | 1 | 0 | 0 | 1 | 1 | 1 | 8 | 751.92 |
| Sterile lube | 6 | 0 | 1 | 1 | 0 | 1 | 1 | 0 | 1 | 2 | 1 | 8 | 48 |
| Straight-connector | 28.39 | 0 | 1 | 0 | 1 | 0 | 0 | 0 | 1 | 0 | 1 | 4 | 113.56 |
| Suction tip | 58.07 | 0 | 1 | 1 | 3 | 1 | 2 | 1 | 1 | 1 | 1 | 12 | 696.84 |
| Suction tubing | 436.64 | 1 | 1 | 1 | 3 | 1 | 1 | 1 | 1 | 1 | 1 | 12 | 5239.68 |
| Surgical face mask | 17.43 | 6 | 6 | 6 | 4 | 5 | 6 | 5 | 4 | 6 | 6 | 54 | 941.22 |
| Surgical hat | 3.54 | 2 | 3 | 5 | 2 | 2 | 3 | 2 | 1 | 2 | 3 | 25 | 88.5 |
| “Surgicel” Snow | 9.9 | 1 | 1 | 0 | 0 | 0 | 0 | 1 | 1 | 1 | 0 | 5 | 49.5 |
| Suture material Monocryl | 16.99 | 2 | 1 | 1 | 1 | 2 | 1 | 1 | 1 | 1 | 1 | 12 | 203.88 |
| Suture material Nylon | 16.99 | 0 | 0 | 0 | 1 | 0 | 0 | 0 | 0 | 1 | 0 | 2 | 33.98 |
| Suture material PDS | 16.99 | 1 | 1 | 1 | 2 | 1 | 1 | 1 | 1 | 1 | 1 | 11 | 186.89 |
| Swabs (30 x 30, sterile) | 713.28 | 0 | 0 | 0 | 0 | 0 | 0 | 0 | 0 | 0 | 0 | 0 | 0 |
| Swabs (non-sterile) | 6.5 | 16 | 15 | 1 | 16 | 25 | 13 | 20 | 5 | 18 | 17 | 146 | 949 |
| Swabs 10cm x 10cm (10 pack, sterile) | 203.27 | 1 | 1 | 1 | 1 | 1 | 1 | 1 | 1 | 1 | 1 | 10 | 2032.7 |
| Topical skin adhesive 0.8g | 3922 | 0 | 0 | 0 | 0 | 0 | 0 | 0 | 0 | 0 | 0 | 0 | 0 |
| Trolley cover/ table drape | 1049.85 | 1 | 1 | 1 | 1 | 1 | 1 | 1 | 1 | 1 | 1 | 10 | 10498.5 |
| Y- connector | 42.37 | 1 | 0 | 1 | 0 | 0 | 1 | 1 | 0 | 0 | 1 | 5 | 211.85 |
| Yellow waste bag | 30.57 | 1 | 1 | 2 | 2 | 2 | 0 | 1 | 1 | 1 | 1 | 12 | 366.84 |
